# Supplementary material for: Bedrock uplift reduces Antarctic sea-level contribution over next centuries
Source: Research Square preprint supplement (doi:10.21203/rs.3.rs-4863941/v1), 2024-09-04
Supplement: Supplementary file 1 [file b9f85d5fab36c45e8380b17e.pdf]

# 1    **Extended data figures and tables**

2

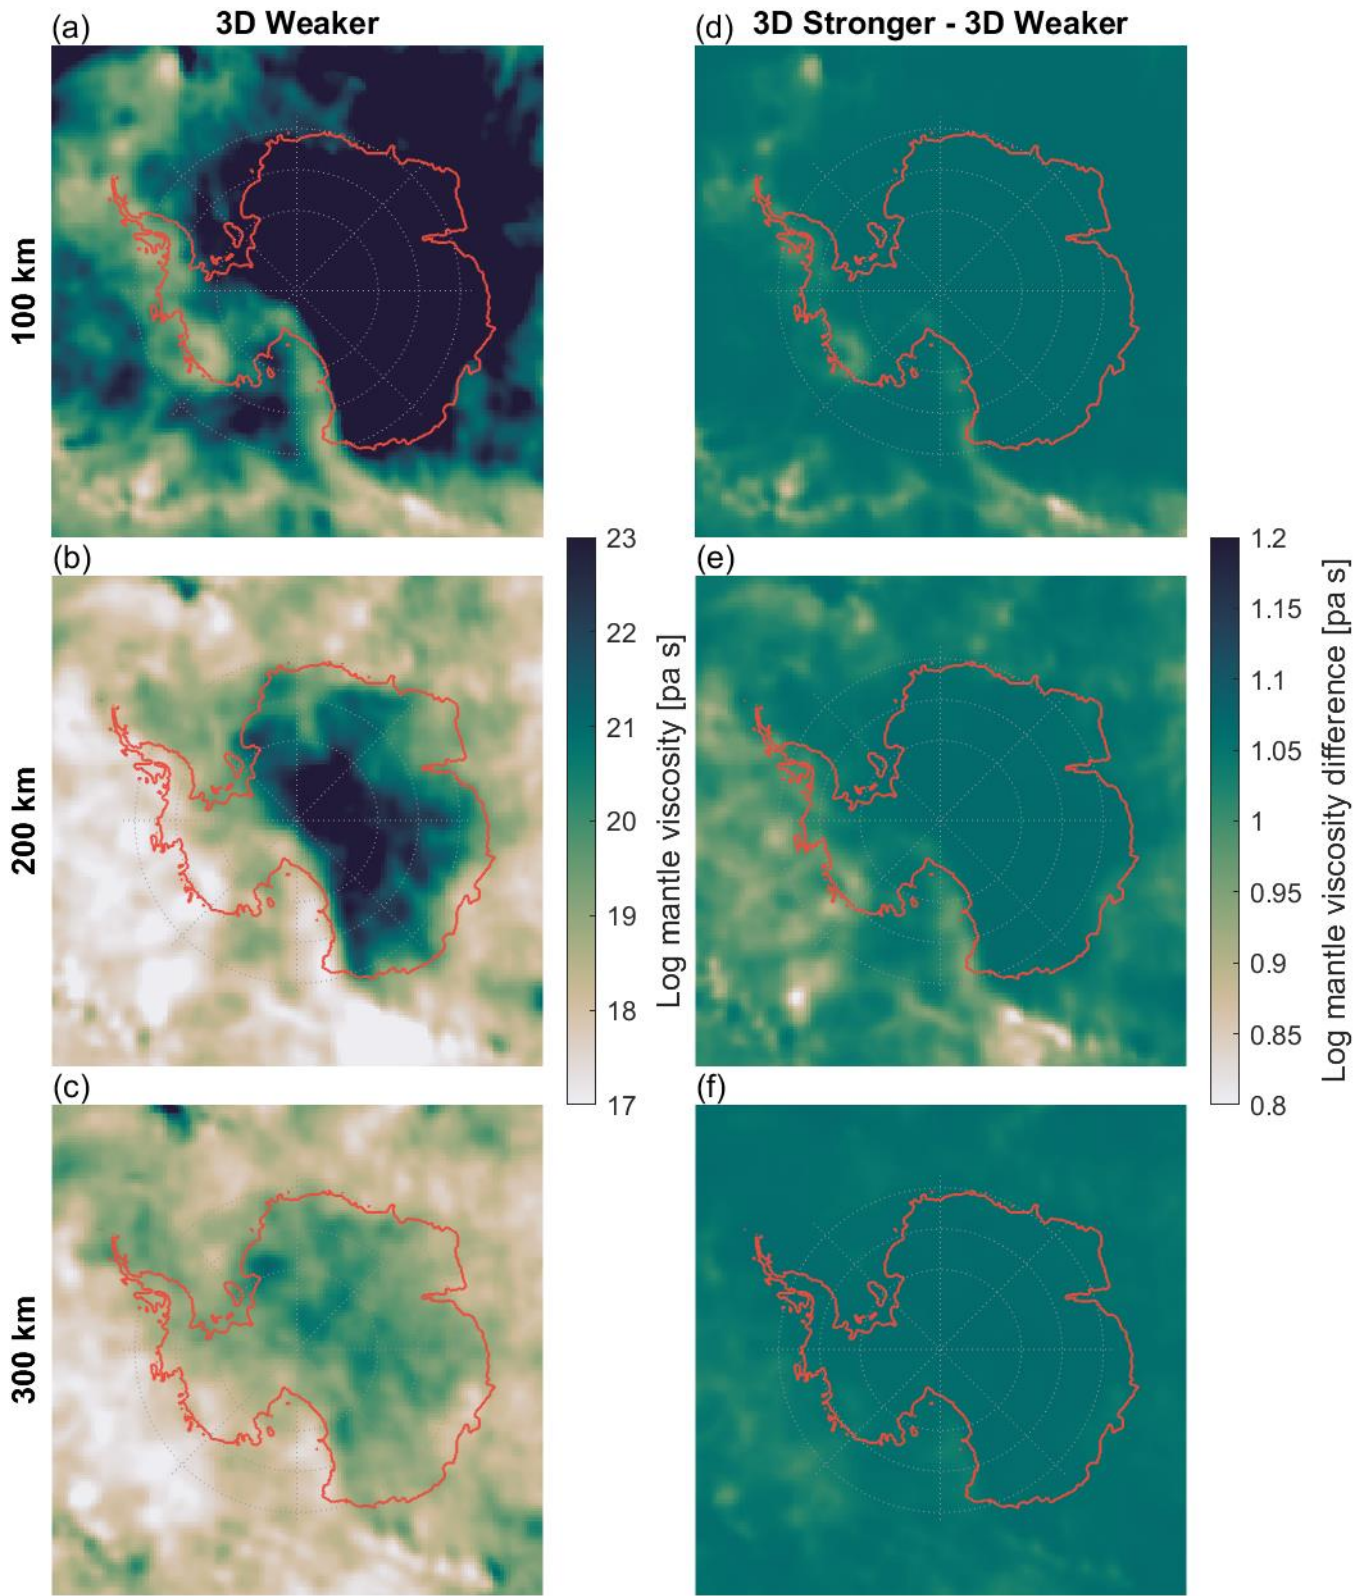

**Extended Data Fig. 1: Viscosity at the depth of 100, 200 and 300 km of the 3D weaker rheology (panels a-c) and the difference in viscosity between the 3D stronger and the 3D weaker rheologies (panels d-f).**

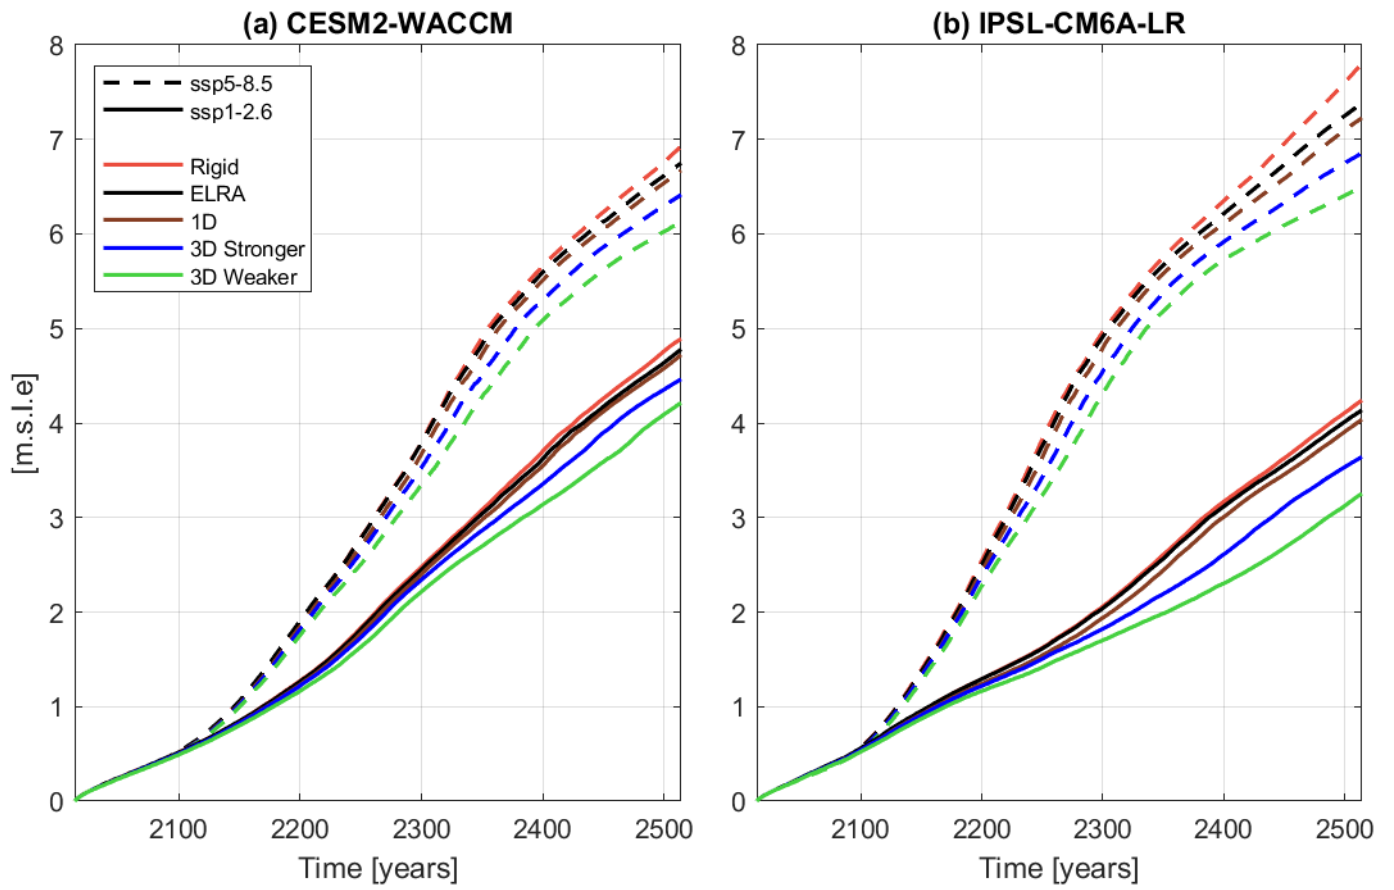

**Extended data Fig. 2: Barystatic sea level contribution under two different scenarios, two different global climate models and 5 different Earth structures (Methods).**

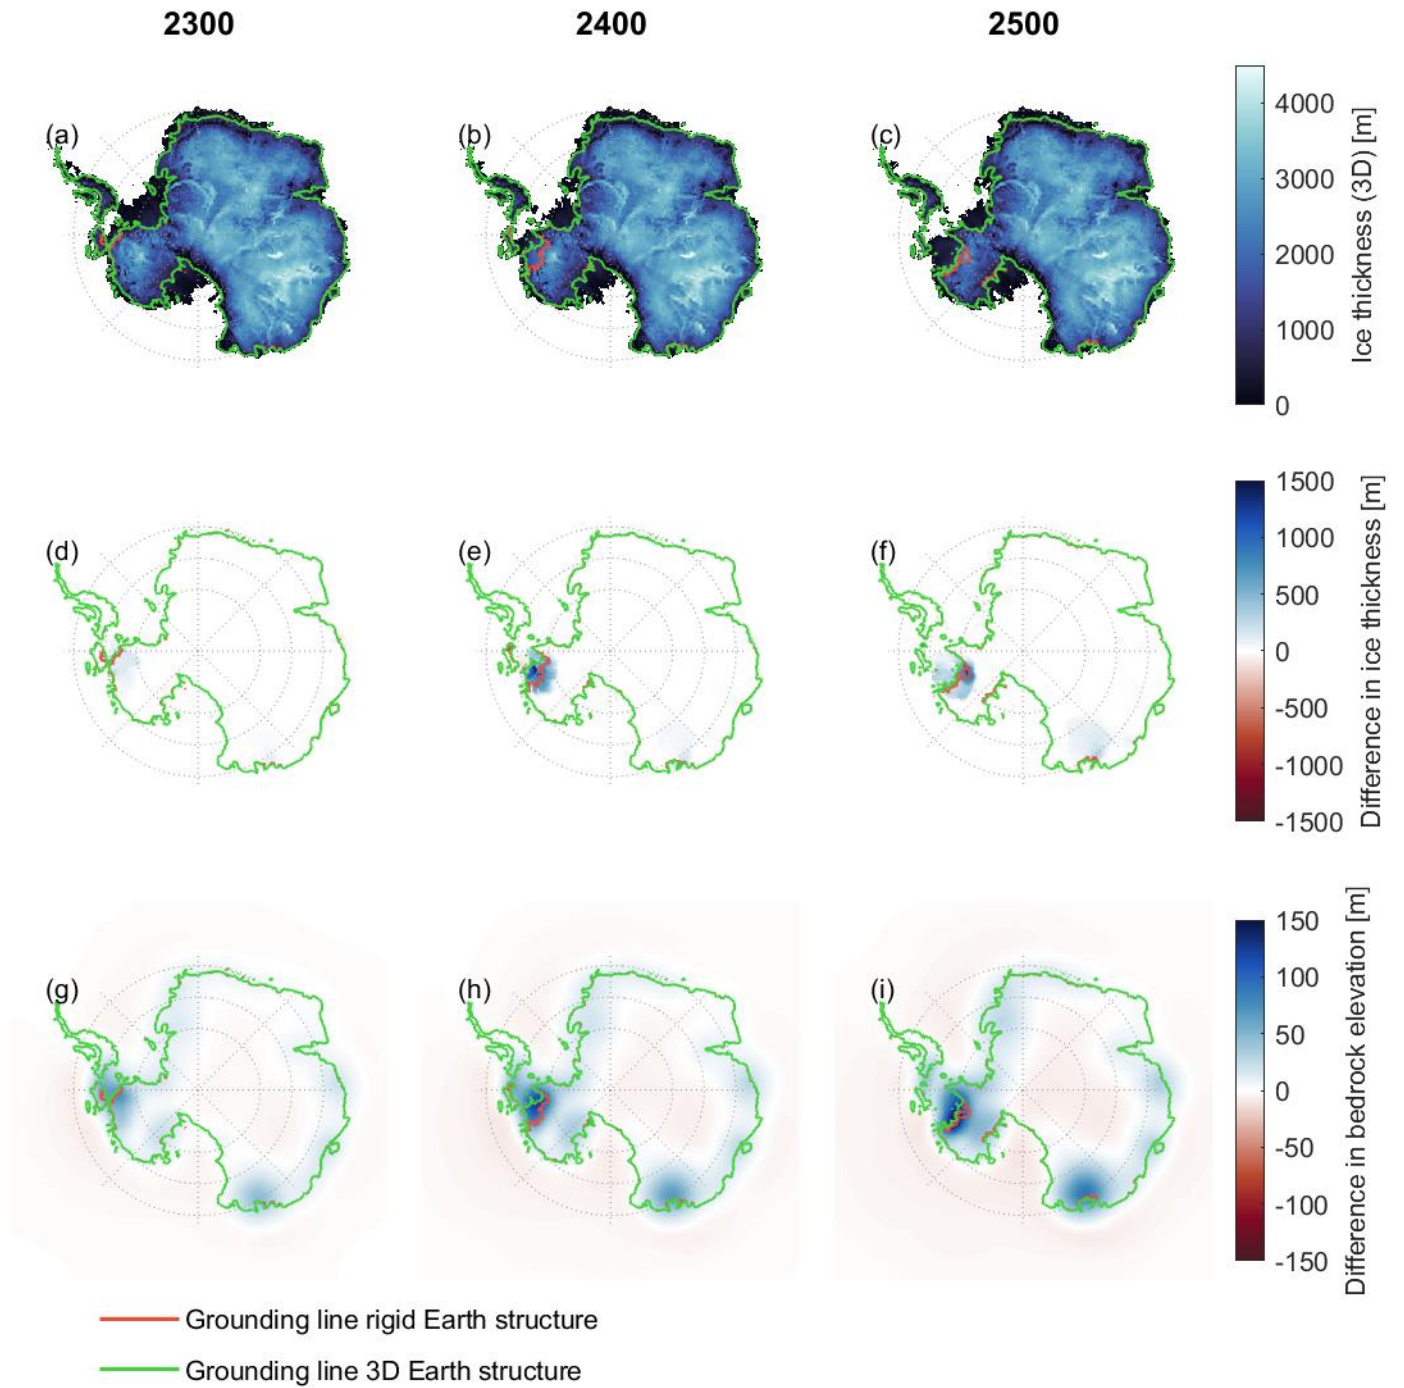

**Extended data Fig. 3: The ice thickness of the West Antarctic ice sheet at 2300 , 2400 and 2500 using the 3D Earth structure when applying CESM2-WACCM under the low emission scenario ssp1-2.6 (panel a-c). Panel d-f show the ice thickness difference between using the 3D Earth structure and the rigid Earth structure. Panel g-i show the difference in bedrock elevation between using the 3D Earth structure and the rigid Earth structure. CESM2-WACCM corresponds to the climate model with main warming in the Weddel sea (Methods).**



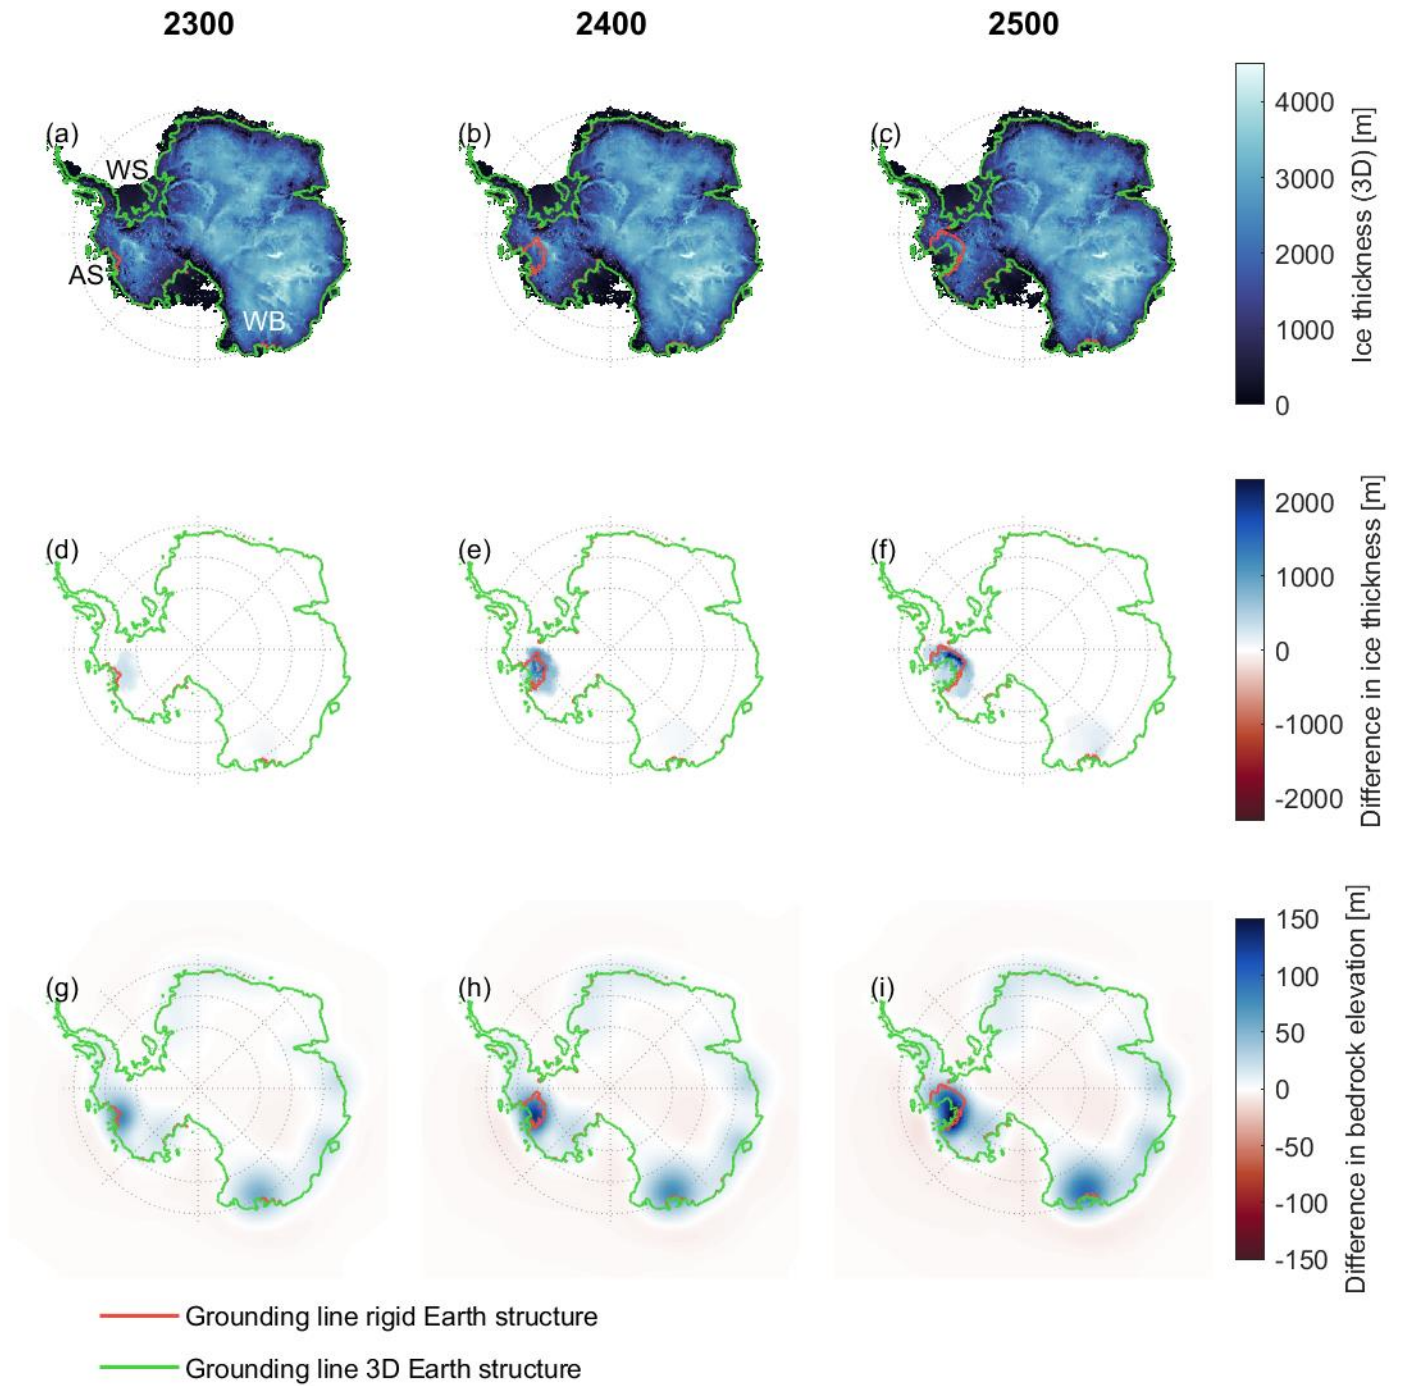

**Extended data Fig. 4: The ice thickness of the West Antarctic ice sheet at 2300 , 2400 and 2500 using the 3D Earth structure when applying IPSL-CM6A-LR under the low emission scenario ssp1-2.6 (panel a-c).** AS in panel a indicates the Amundsen sea, and WS indicates the Weddel sea, and WB indicates Wilkes basin. Panel d-f show the ice thickness difference between using the 3D Earth structure and the rigid Earth structure. Panel g-i show the difference in bedrock elevation between using the 3D Earth structure and the rigid Earth structure. IPSL-CM6A-LR corresponds to the climate model with main warming in the Amundsen sea (Methods).

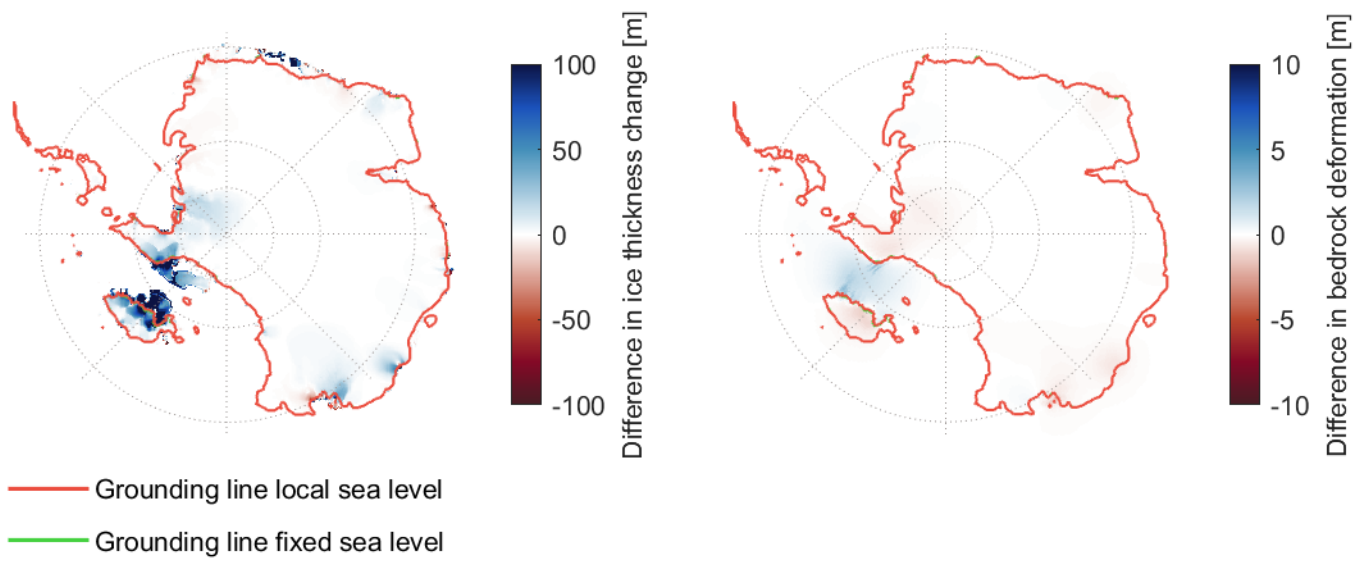

**Extended Data Fig. 5: The left panel shows the difference in bedrock deformation when geoid is included vs when geoid is excluded. The right panel shows the difference in ice thickness change.**

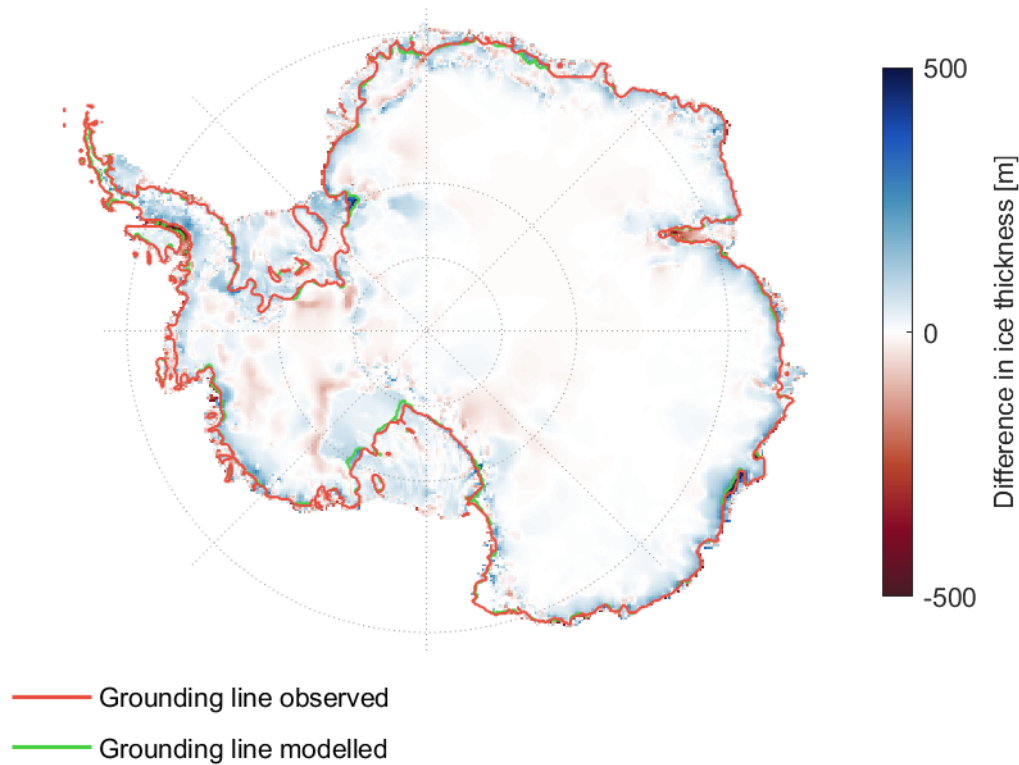

**Extended Data Fig. 6: Ice thickness at the end of the inversion minus observed ice thickness (Bedmachine version 3).**

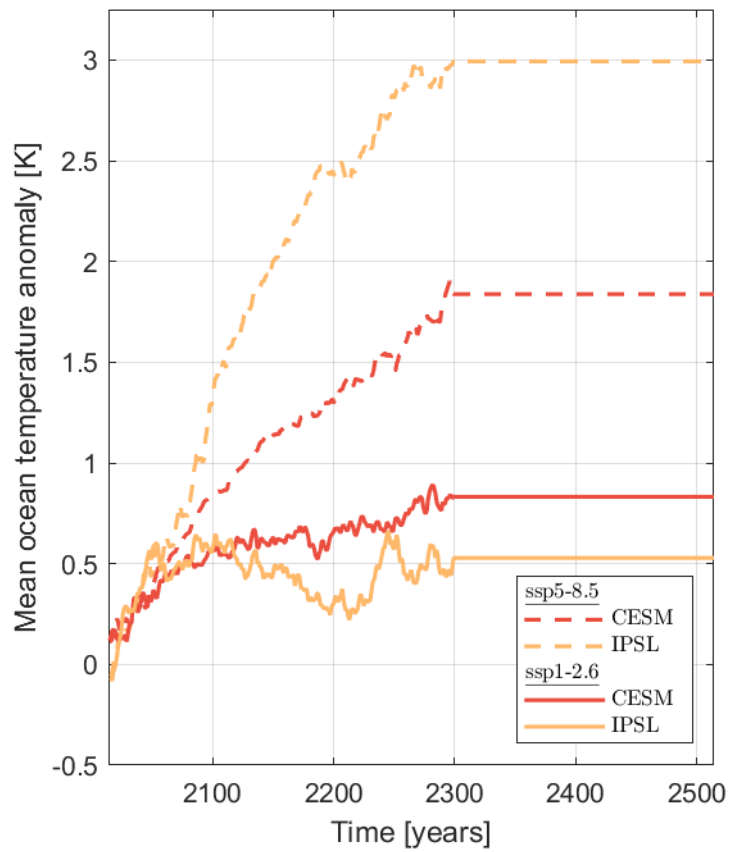

**Extended Data Fig. 7: The mean ocean temperature anomaly over the present day ice shelf area between 2014 and 2514.** The anomalies are taken from Coulon et al.<sup>9</sup>, whom used ocean temperature anomalies from the global climate models CESM2-WACCM (indicated by CESM) and IPSL-CM6A-LR (indicated by IPSL) for two different IPCC scenario's: SSP5-8.5 and SSP1-2.6. The anomalies are averaged over the present day ice shelf area for each time step.

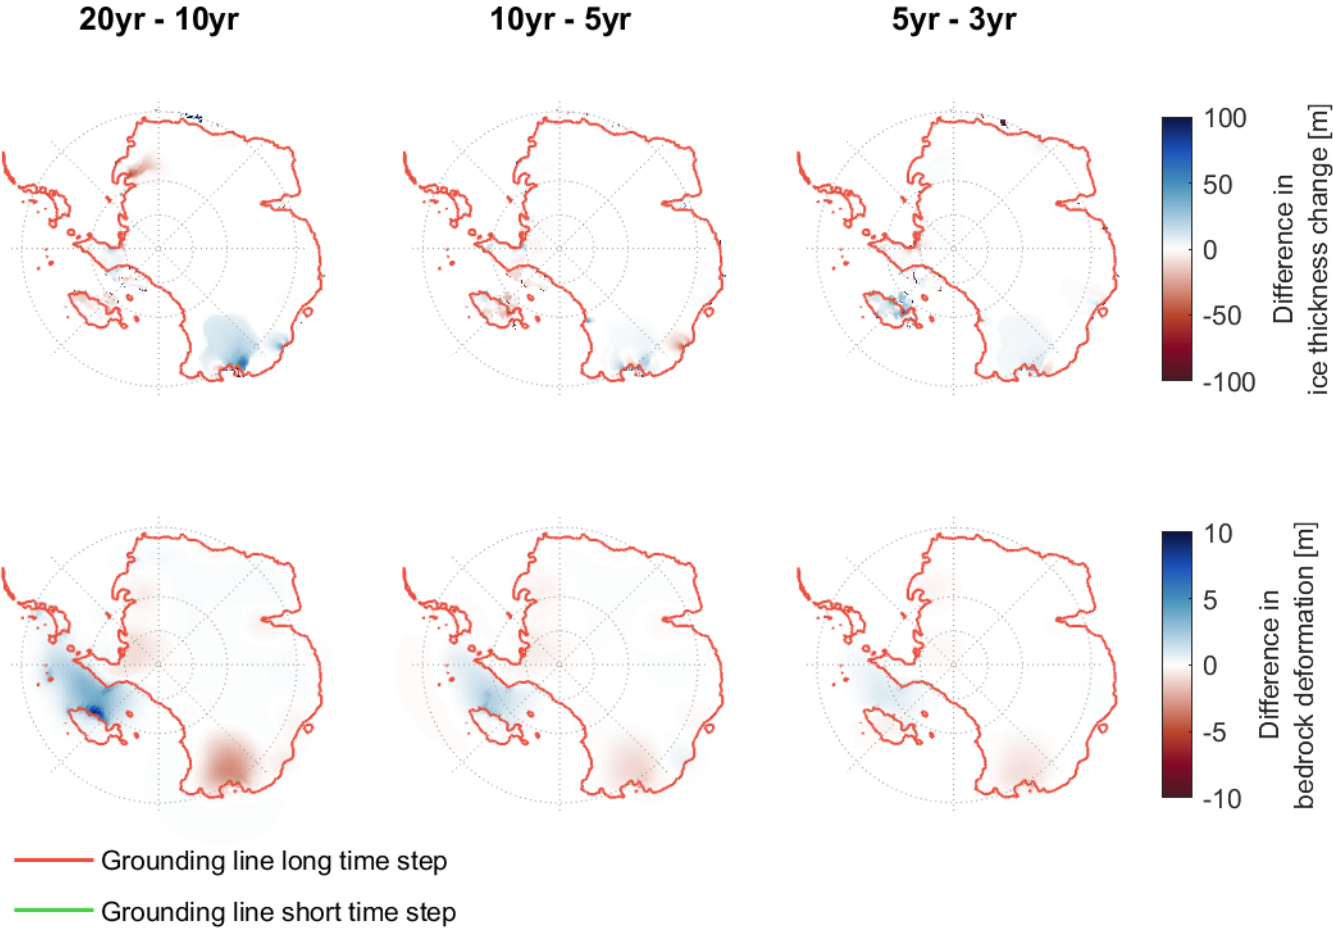

39 **Extended data Fig. 8: Difference in ice thickness (panels a-c) and bedrock deformation (panels d-f)**  
40 **between different coupling time steps. Note that the red line is overlapping the green line.**



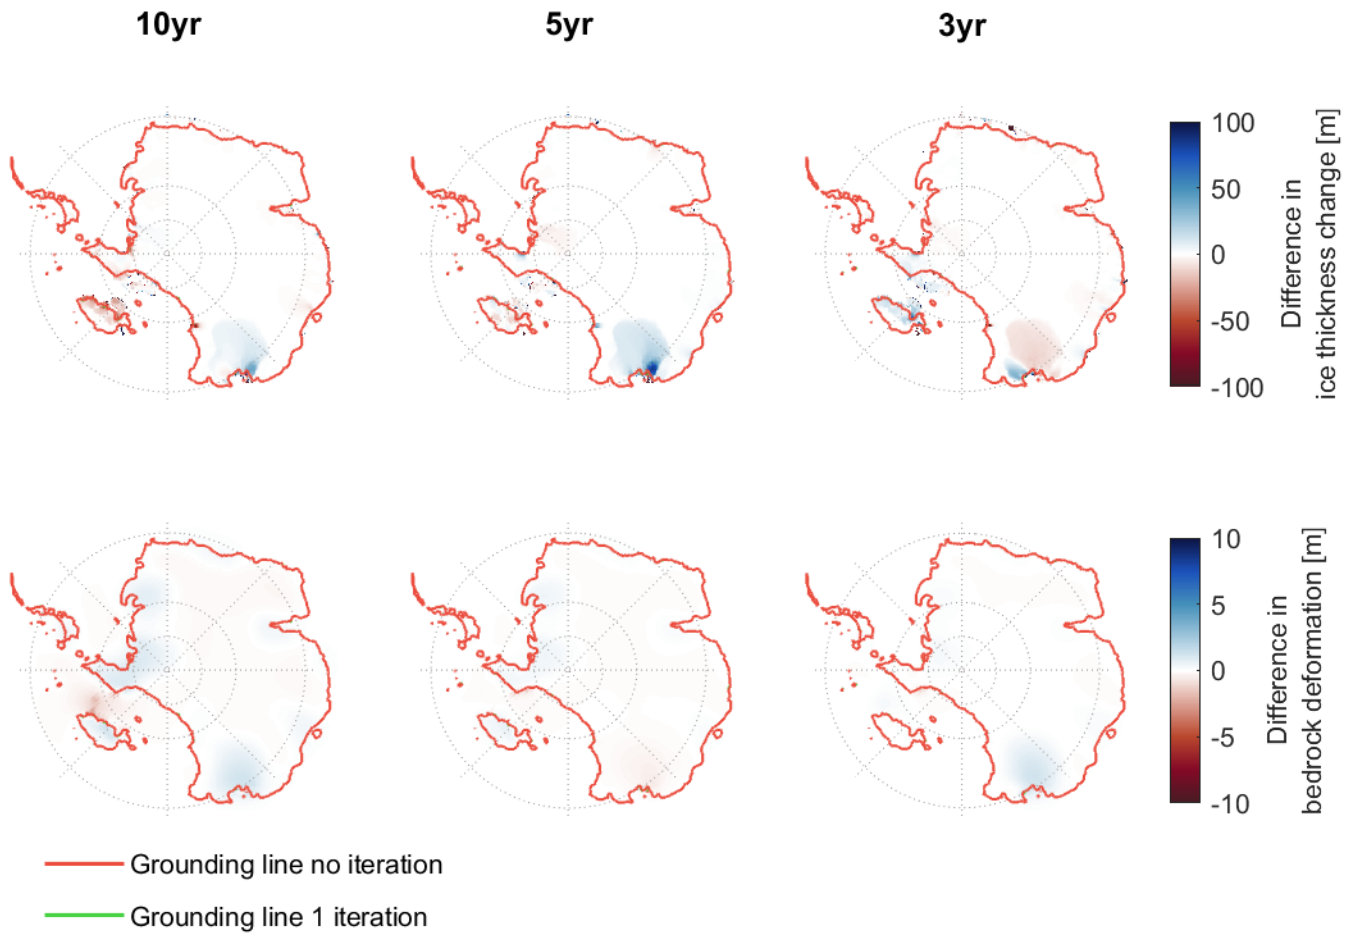

**Extended Data Fig. 9: Difference in ice thickness and bedrock deformation between applying 1 iteration and applying no iterations for each coupling time step.** Note that the red line is overlapping the green line.

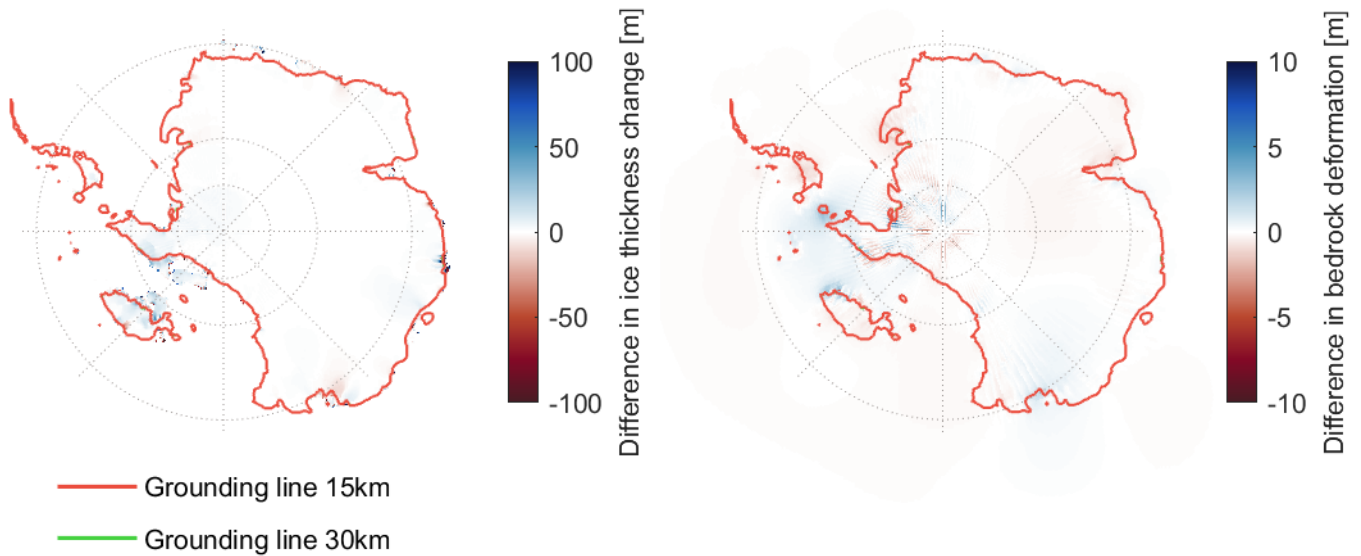

**Extended Data Fig. 10: The left panel shows the difference in ice thickness change between using a 30 km resolution of the GIA model and 15 km resolution. The right panel shows the difference in bedrock deformation.** Note that the red line is overlapping the green line.

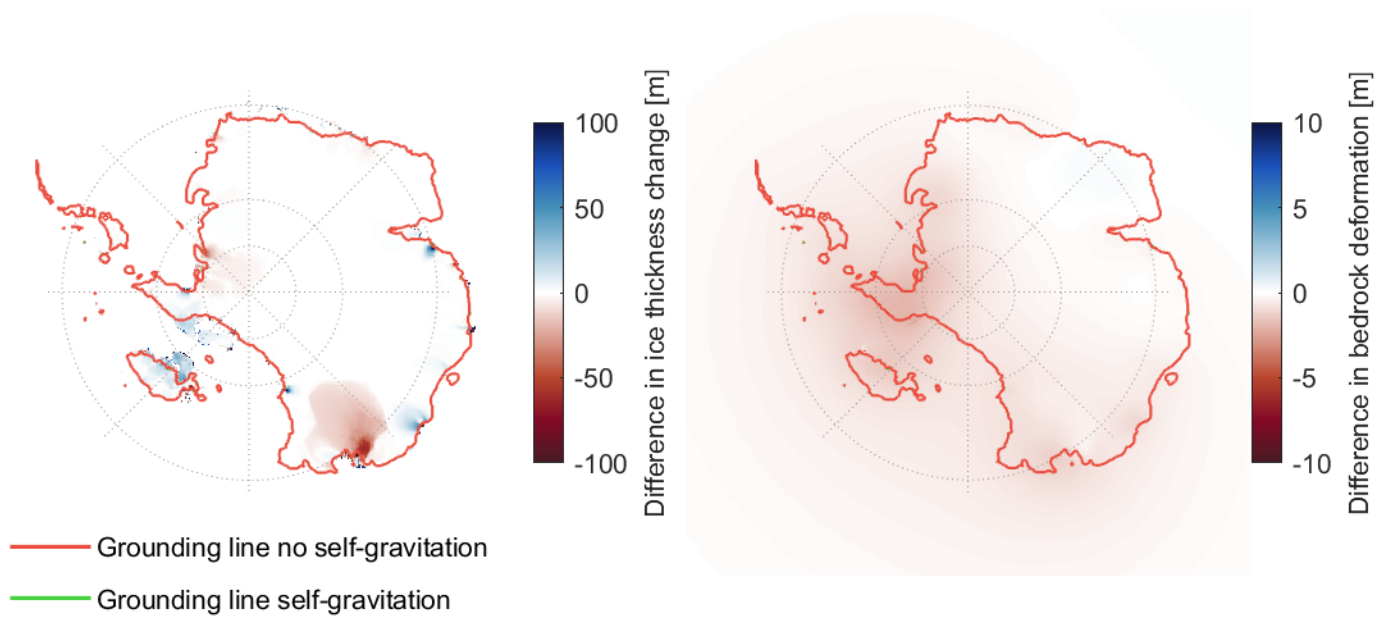

**Extended Data Fig. 11: The left panel shows the difference in ice thickness change when self-gravity is included vs when self-gravity is excluded. The right panel shows the difference in bedrock deformation. Note that the red line is overlapping the green line.**

54 **Extended Data Table 1: Maximum reduction in sea level rise of the 3D Earth structures compared to**  
 55 **rigid Earth.** The climate model IPSL-CM6A-LR is referred to as IPSL and the climate model CESM2-  
 56 WACCM is referred to as CESM.

| Climate model | Emission scenario [SSP] | Reduction of 3D weaker [%] | Reduction of 3D stronger [%] |
|---------------|-------------------------|----------------------------|------------------------------|
| CESM          | 5-8.5                   | 12                         | 7                            |
| CESM          | 1-2.6                   | 16                         | 9                            |
| IPSL          | 5-8.5                   | 17                         | 12                           |
| IPSL          | 1-2.6                   | 23                         | 14                           |

57

58 **Extended Data Table 2: Maximum delay in grounding line retreat in years.**

|             | IPSL-CM6A-LR | CESM2-WACCM |
|-------------|--------------|-------------|
| 3D Weaker   | 130          | 70          |
| 3D Stronger | 80           | 50          |

59

60 **Extended Data Table 3: Maximum reduction in sea level rise of the climate models IPSL-CM6A-LR**  
 61 **compared to CESM2-WACCM.**

| Emission scenario [SSP] | Reduction of rigid Earth [%] | Reduction of 3D weaker [%] | Reduction of 3D stronger [%] |
|-------------------------|------------------------------|----------------------------|------------------------------|
| 5-8.5                   | 26                           | 22                         | 23                           |
| 1-2.6                   | 16                           | 31                         | 25                           |

62

63 **Extended Data Table 4: Maximum reduction in sea level rise of the low emission scenario compared to**  
 64 **the high emission scenario.** The climate model IPSL-CM6A-LR is referred to as IPSL and the climate  
 65 model CESM2-WACCM is referred to as CESM.

| Climate model | Reduction of rigid Earth [%] | Reduction of 3D weaker [%] | Reduction of 3D stronger [%] |
|---------------|------------------------------|----------------------------|------------------------------|
| CESM          | 46                           | 36                         | 35                           |
| IPSL          | 29                           | 59                         | 57                           |

66

67 **Extended Data Table 5: Contribution of all components to global mean sea level rise, except the**  
 68 **component of Antarctica (IPCC AR6 chapter 9).**

| Contribution       | SSP1.2-6 |      | SSP5.8-5 |      |
|--------------------|----------|------|----------|------|
|                    | 2100     | 2300 | 2100     | 2300 |
| Thermal expansion  | 0.14     | 0.19 | 0.3      | 0.92 |
| Greenland          | 0.06     | 0.11 | 0.13     | 0.32 |
| Glaciers           | 0.09     | 0.12 | 0.18     | 0.32 |
| Land-water storage | 0.03     | 0.05 | 0.03     | 0.05 |

69
